# Supplementary material
Source: PubMed Central journal article supplement (PMC8557339)
Supplement: awab153_supplementary_data.pdf [file awab153_supplementary_data.pdf]

**Supplementary Table 1. Allele carrier frequencies of anti-AK5 LE patients compared to controls.**

| Allele  | Controls, n=442 (%) | Patients, n=11 (%) | Uncorrected p value | Corrected p value |
|---------|---------------------|--------------------|---------------------|-------------------|
| A*01:01 | 92 (20.8)           | 7 (63.6)           | 0.002995            | 0.12579           |
| A*01:23 | 1 (0.2)             | 0 (0.0)            |                     |                   |
| A*02:01 | 161 (36.4)          | 4 (36.4)           |                     |                   |
| A*02:02 | 11 (2.5)            | 0 (0.0)            |                     |                   |
| A*02:03 | 2 (0.5)             | 0 (0.0)            |                     |                   |
| A*02:05 | 12 (2.7)            | 0 (0.0)            |                     |                   |
| A*02:06 | 3 (0.7)             | 0 (0.0)            |                     |                   |
| A*02:17 | 2 (0.5)             | 0 (0.0)            |                     |                   |
| A*02:38 | 1 (0.2)             | 0 (0.0)            |                     |                   |
| A*03:01 | 88 (19.9)           | 0 (0.0)            | 0.133190            |                   |
| A*03:02 | 3 (0.7)             | 0 (0.0)            |                     |                   |
| A*11:01 | 41 (9.3)            | 1 (9.1)            |                     |                   |
| A*11:02 | 1 (0.2)             | 0 (0.0)            |                     |                   |
| A*23:01 | 33 (7.5)            | 1 (9.1)            | 0.580313            |                   |
| A*23:17 | 2 (0.5)             | 0 (0.0)            |                     |                   |
| A*24:02 | 78 (17.6)           | 1 (9.1)            | 0.698098            |                   |
| A*24:03 | 6 (1.4)             | 0 (0.0)            |                     |                   |
| A*24:10 | 1 (0.2)             | 0 (0.0)            |                     |                   |
| A*25:01 | 12 (2.7)            | 0 (0.0)            |                     |                   |
| A*26:01 | 37 (8.4)            | 1 (9.1)            |                     |                   |
| A*26:08 | 1 (0.2)             | 0 (0.0)            |                     |                   |
| A*29:01 | 6 (1.4)             | 0 (0.0)            |                     |                   |
| A*29:02 | 41 (9.3)            | 0 (0.0)            | 0.609694            |                   |
| A*30:01 | 16 (3.6)            | 0 (0.0)            |                     |                   |
| A*30:02 | 11 (2.5)            | 0 (0.0)            |                     |                   |
| A*30:04 | 7 (1.6)             | 0 (0.0)            |                     |                   |
| A*31:01 | 24 (5.4)            | 1 (9.1)            | 0.468294            |                   |
| A*31:04 | 1 (0.2)             | 0 (0.0)            |                     |                   |
| A*32:01 | 57 (12.9)           | 1 (9.1)            |                     |                   |
| A*32:26 | 1 (0.2)             | 0 (0.0)            |                     |                   |
| A*33:01 | 13 (2.9)            | 1 (9.1)            | 0.294786            |                   |
| A*33:03 | 10 (2.3)            | 1 (9.1)            | 0.239268            |                   |
| A*33:05 | 1 (0.2)             | 0 (0.0)            |                     |                   |
| A*34:02 | 5 (1.1)             | 0 (0.0)            |                     |                   |
| A*36:01 | 4 (0.9)             | 0 (0.0)            |                     |                   |
| A*66:01 | 4 (0.9)             | 0 (0.0)            |                     |                   |
| A*66:02 | 1 (0.2)             | 0 (0.0)            |                     |                   |
| A*66:03 | 1 (0.2)             | 0 (0.0)            |                     |                   |
| A*68:01 | 25 (5.7)            | 0 (0.0)            |                     |                   |
| A*68:02 | 18 (4.1)            | 1 (9.1)            | 0.379186            |                   |
| A*74:01 | 3 (0.7)             | 0 (0.0)            |                     |                   |
| A*80:01 | 1 (0.2)             | 0 (0.0)            |                     |                   |
| B*07:02 | 74 (16.7)           | 0 (0.0)            | 0.224724            |                   |
| B*07:05 | 3 (0.7)             | 0 (0.0)            |                     |                   |
| B*07:06 | 3 (0.7)             | 0 (0.0)            |                     |                   |
| B*08:01 | 51 (11.5)           | 7 (63.6)           | 0.000088            | 0.005808          |
| B*13:02 | 13 (2.9)            | 2 (18.2)           | 0.047399            |                   |
| B*14:01 | 21 (4.8)            | 0 (0.0)            |                     |                   |
| B*14:02 | 36 (8.1)            | 2 (18.2)           | 0.233546            |                   |
| B*15:01 | 29 (6.6)            | 0 (0.0)            |                     |                   |
| B*15:03 | 13 (2.9)            | 0 (0.0)            |                     |                   |
| B*15:09 | 1 (0.2)             | 0 (0.0)            |                     |                   |
| B*15:10 | 2 (0.5)             | 0 (0.0)            |                     |                   |
| B*15:16 | 1 (0.2)             | 0 (0.0)            |                     |                   |
| B*15:17 | 6 (1.4)             | 1 (9.1)            | 0.159065            |                   |
| B*15:18 | 5 (1.1)             | 0 (0.0)            |                     |                   |
| B*15:24 | 1 (0.2)             | 0 (0.0)            |                     |                   |
| B*15:25 | 1 (0.2)             | 0 (0.0)            |                     |                   |
| B*18:01 | 52 (11.8)           | 0 (0.0)            | 0.623491            |                   |
| B*18:02 | 1 (0.2)             | 0 (0.0)            |                     |                   |
| B*18:26 | 1 (0.2)             | 0 (0.0)            |                     |                   |
| B*27:02 | 5 (1.1)             | 0 (0.0)            |                     |                   |
| B*27:03 | 1 (0.2)             | 0 (0.0)            |                     |                   |
| B*27:05 | 27 (6.1)            | 0 (0.0)            |                     |                   |
| B*27:06 | 1 (0.2)             | 0 (0.0)            |                     |                   |
| B*27:07 | 1 (0.2)             | 0 (0.0)            |                     |                   |
| B*35:01 | 48 (10.9)           | 0 (0.0)            | 0.615755            |                   |
| B*35:02 | 6 (1.4)             | 1 (9.1)            | 0.159065            |                   |
| B*35:03 | 14 (3.2)            | 0 (0.0)            |                     |                   |
| B*35:08 | 3 (0.7)             | 0 (0.0)            |                     |                   |
| B*37:01 | 15 (3.4)            | 0 (0.0)            |                     |                   |
| B*38:01 | 22 (5.0)            | 0 (0.0)            |                     |                   |

|            |            |          |          |          |
|------------|------------|----------|----------|----------|
| B*38:02    | 2 (0.5)    | 0 (0.0)  |          |          |
| B*39:01    | 5 (1.1)    | 0 (0.0)  |          |          |
| B*39:06    | 1 (0.2)    | 0 (0.0)  |          |          |
| B*39:10    | 3 (0.7)    | 0 (0.0)  |          |          |
| B*39:31    | 1 (0.2)    | 0 (0.0)  |          |          |
| B*40:01    | 27 (6.1)   | 0 (0.0)  |          |          |
| B*40:02    | 13 (2.9)   | 0 (0.0)  |          |          |
| B*41:01    | 6 (1.4)    | 0 (0.0)  |          |          |
| B*41:02    | 9 (2.0)    | 0 (0.0)  |          |          |
| B*42:01    | 6 (1.4)    | 0 (0.0)  |          |          |
| B*44:02    | 40 (9.0)   | 2 (18.2) | 0.271266 |          |
| B*44:03    | 62 (14.0)  | 1 (9.1)  |          |          |
| B*44:04    | 2 (0.5)    | 0 (0.0)  |          |          |
| B*44:05    | 2 (0.5)    | 0 (0.0)  |          |          |
| B*44:115   | 1 (0.2)    | 0 (0.0)  |          |          |
| B*45:01    | 13 (2.9)   | 0 (0.0)  |          |          |
| B*47:01    | 1 (0.2)    | 0 (0.0)  |          |          |
| B*48:01    | 2 (0.5)    | 0 (0.0)  |          |          |
| B*49:01    | 24 (5.4)   | 0 (0.0)  |          |          |
| B*50:01    | 24 (5.4)   | 1 (9.1)  | 0.468294 |          |
| B*50:02    | 3 (0.7)    | 0 (0.0)  |          |          |
| B*51:01    | 55 (12.4)  | 1 (9.1)  |          |          |
| B*51:02    | 1 (0.2)    | 0 (0.0)  |          |          |
| B*51:07    | 1 (0.2)    | 0 (0.0)  |          |          |
| B*51:08    | 1 (0.2)    | 0 (0.0)  |          |          |
| B*51:165   | 1 (0.2)    | 0 (0.0)  |          |          |
| B*52:01    | 10 (2.3)   | 0 (0.0)  |          |          |
| B*53:01    | 24 (5.4)   | 0 (0.0)  |          |          |
| B*55:01    | 7 (1.6)    | 1 (9.1)  | 0.179805 |          |
| B*56:01    | 9 (2.0)    | 0 (0.0)  |          |          |
| B*57:01    | 21 (4.8)   | 2 (18.2) | 0.102628 |          |
| B*58:01    | 16 (3.6)   | 0 (0.0)  |          |          |
| B*58:02    | 2 (0.5)    | 0 (0.0)  |          |          |
| B*73:01    | 3 (0.7)    | 0 (0.0)  |          |          |
| B*81:01    | 2 (0.5)    | 0 (0.0)  |          |          |
| B*82:01    | 1 (0.2)    | 0 (0.0)  |          |          |
| C*01:02    | 25 (5.7)   | 0 (0.0)  |          |          |
| C*02:02    | 51 (11.5)  | 0 (0.0)  | 0.621312 |          |
| C*02:10    | 13 (2.9)   | 0 (0.0)  |          |          |
| C*03:02    | 5 (1.1)    | 0 (0.0)  |          |          |
| C*03:03    | 26 (5.9)   | 1 (9.1)  | 0.495305 |          |
| C*03:04    | 33 (7.5)   | 0 (0.0)  |          |          |
| C*04:01    | 108 (24.4) | 2 (18.2) |          |          |
| C*04:09    | 6 (1.4)    | 0 (0.0)  |          |          |
| C*05:01    | 48 (10.9)  | 1 (9.1)  |          |          |
| C*06:02    | 83 (18.8)  | 5 (45.5) | 0.042990 |          |
| C*07:01    | 86 (19.5)  | 8 (72.7) | 0.000253 | 0.008349 |
| C*07:02    | 83 (18.8)  | 0 (0.0)  | 0.228408 |          |
| C*07:04    | 16 (3.6)   | 0 (0.0)  |          |          |
| C*07:06    | 2 (0.5)    | 0 (0.0)  |          |          |
| C*07:18    | 13 (2.9)   | 0 (0.0)  |          |          |
| C*08:02    | 56 (12.7)  | 2 (18.2) | 0.639443 |          |
| C*08:03    | 2 (0.5)    | 0 (0.0)  |          |          |
| C*12:02    | 10 (2.3)   | 0 (0.0)  |          |          |
| C*12:03    | 52 (11.8)  | 1 (9.1)  |          |          |
| C*14:02    | 7 (1.6)    | 0 (0.0)  |          |          |
| C*14:03    | 3 (0.7)    | 0 (0.0)  |          |          |
| C*15:02    | 24 (5.4)   | 1 (9.1)  | 0.468294 |          |
| C*15:04    | 3 (0.7)    | 0 (0.0)  |          |          |
| C*15:05    | 8 (1.8)    | 0 (0.0)  |          |          |
| C*15:06    | 2 (0.5)    | 0 (0.0)  |          |          |
| C*15:13    | 2 (0.5)    | 0 (0.0)  |          |          |
| C*16:01    | 45 (10.2)  | 0 (0.0)  | 0.611857 |          |
| C*16:02    | 4 (0.9)    | 0 (0.0)  |          |          |
| C*16:04    | 1 (0.2)    | 0 (0.0)  |          |          |
| C*16:35    | 2 (0.5)    | 0 (0.0)  |          |          |
| C*17:01    | 10 (2.3)   | 0 (0.0)  |          |          |
| C*17:03    | 9 (2.0)    | 0 (0.0)  |          |          |
| C*18:01    | 2 (0.5)    | 0 (0.0)  |          |          |
| DRB1*01:01 | 53 (12.0)  | 1 (9.1)  |          |          |
| DRB1*01:02 | 40 (9.0)   | 1 (9.1)  |          |          |
| DRB1*01:03 | 1 (0.2)    | 0 (0.0)  |          |          |
| DRB1*03:01 | 69 (15.6)  | 8 (72.7) | 0.000054 | 0.002214 |
| DRB1*03:02 | 4 (0.9)    | 0 (0.0)  |          |          |
| DRB1*04:01 | 35 (7.9)   | 0 (0.0)  |          |          |

|            |            |          |          |          |
|------------|------------|----------|----------|----------|
| DRB1*04:02 | 13 (2.9)   | 0 (0.0)  |          |          |
| DRB1*04:03 | 17 (3.8)   | 0 (0.0)  |          |          |
| DRB1*04:04 | 14 (3.2)   | 0 (0.0)  |          |          |
| DRB1*04:05 | 13 (2.9)   | 0 (0.0)  |          |          |
| DRB1*04:06 | 11 (2.5)   | 0 (0.0)  |          |          |
| DRB1*04:07 | 1 (0.2)    | 0 (0.0)  |          |          |
| DRB1*04:08 | 1 (0.2)    | 0 (0.0)  |          |          |
| DRB1*04:38 | 1 (0.2)    | 0 (0.0)  |          |          |
| DRB1*07:01 | 101 (22.9) | 5 (45.5) | 0.139286 |          |
| DRB1*08:01 | 22 (5.0)   | 0 (0.0)  |          |          |
| DRB1*08:03 | 4 (0.9)    | 0 (0.0)  |          |          |
| DRB1*08:04 | 7 (1.6)    | 0 (0.0)  |          |          |
| DRB1*09:01 | 9 (2.0)    | 0 (0.0)  |          |          |
| DRB1*10:01 | 9 (2.0)    | 0 (0.0)  |          |          |
| DRB1*11:01 | 66 (14.9)  | 0 (0.0)  | 0.379627 |          |
| DRB1*11:02 | 14 (3.2)   | 1 (9.1)  | 0.312456 |          |
| DRB1*11:03 | 4 (0.9)    | 0 (0.0)  |          |          |
| DRB1*11:04 | 41 (9.3)   | 0 (0.0)  | 0.609694 |          |
| DRB1*12:01 | 14 (3.2)   | 0 (0.0)  |          |          |
| DRB1*12:02 | 5 (1.1)    | 0 (0.0)  |          |          |
| DRB1*13:01 | 62 (14.0)  | 1 (9.1)  |          |          |
| DRB1*13:02 | 40 (9.0)   | 3 (27.3) | 0.076680 |          |
| DRB1*13:03 | 13 (2.9)   | 0 (0.0)  |          |          |
| DRB1*13:04 | 2 (0.5)    | 0 (0.0)  |          |          |
| DRB1*13:05 | 5 (1.1)    | 0 (0.0)  |          |          |
| DRB1*14:01 | 6 (1.4)    | 0 (0.0)  |          |          |
| DRB1*14:04 | 1 (0.2)    | 0 (0.0)  |          |          |
| DRB1*14:17 | 2 (0.5)    | 0 (0.0)  |          |          |
| DRB1*14:54 | 28 (6.3)   | 0 (0.0)  |          |          |
| DRB1*15:01 | 76 (17.2)  | 1 (9.1)  | 0.699032 |          |
| DRB1*15:02 | 11 (2.5)   | 0 (0.0)  |          |          |
| DRB1*15:03 | 11 (2.5)   | 0 (0.0)  |          |          |
| DRB1*15:04 | 1 (0.2)    | 0 (0.0)  |          |          |
| DRB1*16:01 | 14 (3.2)   | 0 (0.0)  |          |          |
| DRB1*16:02 | 4 (0.9)    | 0 (0.0)  |          |          |
| DQB1*02:01 | 73 (16.5)  | 8 (72.7) | 0.000080 | 0.00128  |
| DQB1*02:02 | 88 (19.9)  | 3 (27.3) | 0.467823 |          |
| DQB1*03:01 | 162 (36.7) | 0 (0.0)  | 0.009340 | 0.14944  |
| DQB1*03:02 | 70 (15.8)  | 0 (0.0)  | 0.227910 |          |
| DQB1*03:03 | 22 (5.0)   | 2 (18.2) | 0.110473 |          |
| DQB1*03:05 | 3 (0.7)    | 0 (0.0)  |          |          |
| DQB1*03:19 | 12 (2.7)   | 1 (9.1)  | 0.276703 |          |
| DQB1*04:02 | 39 (8.8)   | 0 (0.0)  | 0.610103 |          |
| DQB1*05:01 | 108 (24.4) | 2 (18.2) |          |          |
| DQB1*05:02 | 27 (6.1)   | 0 (0.0)  |          |          |
| DQB1*05:03 | 33 (7.5)   | 0 (0.0)  |          |          |
| DQB1*06:01 | 10 (2.3)   | 0 (0.0)  |          |          |
| DQB1*06:02 | 81 (18.3)  | 1 (9.1)  | 0.697573 |          |
| DQB1*06:03 | 59 (13.3)  | 1 (9.1)  |          |          |
| DQB1*06:04 | 30 (6.8)   | 3 (27.3) | 0.038913 | 0.622608 |
| DQB1*06:09 | 9 (2.0)    | 0 (0.0)  |          |          |
| DQA1*01:01 | 91 (20.6)  | 2 (18.2) |          |          |
| DQA1*01:02 | 140 (31.7) | 4 (36.4) | 0.749087 |          |
| DQA1*01:03 | 69 (15.6)  | 1 (9.1)  |          |          |
| DQA1*01:04 | 35 (7.9)   | 0 (0.0)  |          |          |
| DQA1*01:05 | 11 (2.5)   | 0 (0.0)  |          |          |
| DQA1*02:01 | 100 (22.6) | 5 (45.5) | 0.137924 |          |
| DQA1*03:01 | 59 (13.3)  | 0 (0.0)  | 0.373234 |          |
| DQA1*03:02 | 8 (1.8)    | 0 (0.0)  |          |          |
| DQA1*03:03 | 51 (11.5)  | 0 (0.0)  | 0.621312 |          |
| DQA1*04:01 | 26 (5.9)   | 0 (0.0)  |          |          |
| DQA1*04:02 | 3 (0.7)    | 0 (0.0)  |          |          |
| DQA1*04:04 | 1 (0.2)    | 0 (0.0)  |          |          |
| DQA1*05:01 | 69 (15.6)  | 8 (72.7) | 0.000054 | 0.000918 |
| DQA1*05:05 | 143 (32.4) | 1 (9.1)  | 0.185944 |          |
| DQA1*05:09 | 5 (1.1)    | 0 (0.0)  |          |          |
| DQA1*05:11 | 1 (0.2)    | 0 (0.0)  |          |          |
| DQA1*06:01 | 5 (1.1)    | 0 (0.0)  |          |          |
| DPB1*01:01 | 62 (14.0)  | 5 (45.5) | 0.013812 | 0.441984 |
| DPB1*02:01 | 133 (30.1) | 4 (36.4) | 0.741271 |          |
| DPB1*02:02 | 3 (0.7)    | 0 (0.0)  |          |          |
| DPB1*03:01 | 62 (14.0)  | 1 (9.1)  |          |          |
| DPB1*04:01 | 239 (54.1) | 7 (63.6) | 0.761026 |          |
| DPB1*04:02 | 92 (20.8)  | 1 (9.1)  | 0.474008 |          |
| DPB1*05:01 | 27 (6.1)   | 2 (18.2) | 0.152026 |          |

|             |          |          |          |  |
|-------------|----------|----------|----------|--|
| DPBI*06:01  | 8 (1.8)  | 0 (0.0)  |          |  |
| DPBI*09:01  | 5 (1.1)  | 0 (0.0)  |          |  |
| DPBI*10:01  | 14 (3.2) | 0 (0.0)  |          |  |
| DPBI*11:01  | 20 (4.5) | 0 (0.0)  |          |  |
| DPBI*13:01  | 34 (7.7) | 2 (18.2) | 0.214926 |  |
| DPBI*14:01  | 11 (2.5) | 0 (0.0)  |          |  |
| DPBI*15:01  | 4 (0.9)  | 0 (0.0)  |          |  |
| DPBI*16:01  | 3 (0.7)  | 0 (0.0)  |          |  |
| DPBI*17:01  | 22 (5.0) | 0 (0.0)  |          |  |
| DPBI*18:01  | 5 (1.1)  | 0 (0.0)  |          |  |
| DPBI*19:01  | 4 (0.9)  | 0 (0.0)  |          |  |
| DPBI*20:01  | 5 (1.1)  | 0 (0.0)  |          |  |
| DPBI*21:01  | 1 (0.2)  | 0 (0.0)  |          |  |
| DPBI*23:01  | 9 (2.0)  | 0 (0.0)  |          |  |
| DPBI*29:01  | 1 (0.2)  | 0 (0.0)  |          |  |
| DPBI*34:01  | 4 (0.9)  | 0 (0.0)  |          |  |
| DPBI*39:01  | 1 (0.2)  | 0 (0.0)  |          |  |
| DPBI*40:01  | 1 (0.2)  | 0 (0.0)  |          |  |
| DPBI*50:01  | 1 (0.2)  | 0 (0.0)  |          |  |
| DPBI*63:01  | 3 (0.7)  | 0 (0.0)  |          |  |
| DPBI*104:01 | 23 (5.2) | 0 (0.0)  |          |  |
| DPBI*105:01 | 5 (1.1)  | 0 (0.0)  |          |  |
| DPBI*131:01 | 5 (1.1)  | 0 (0.0)  |          |  |
| DPBI*351:01 | 1 (0.2)  | 0 (0.0)  |          |  |
| DPBI*370:01 | 1 (0.2)  | 0 (0.0)  |          |  |

**Supplementary Table 2. AK5-derived peptides predicted as strong binders for HLA class I molecules.**

| Peptide   | Position (AK5-1) | Position (AK5-2) | Position (AK5-3) | A*01:01 | Rank % <sup>a</sup><br>B*08:01 | C*07:01 |
|-----------|------------------|------------------|------------------|---------|--------------------------------|---------|
| LARREIPQL | 10               |                  |                  |         | 0.4167                         |         |
| ARREIPQLF | 11               |                  |                  |         |                                | 0.01    |
| SKPEDPVEY | 29               |                  | 3                |         |                                | 0.2572  |
| SCLQKVKEL | 40               |                  | 14               |         | 0.2183                         |         |
| SRRSFLRNV | 75               |                  | 49               |         |                                | 0.2908  |
| RRSFLRNVN | 76               |                  | 50               |         |                                | 0.1216  |
| NSNFPYRRY | 87               |                  | 61               | 0.3328  |                                |         |
| FPYRRYDRL | 90               |                  | 64               |         | 0.0247                         |         |
| RRYDRLPPI | 93               |                  | 67               |         |                                | 0.0843  |
| DRLPPIHQF | 96               |                  | 70               |         |                                | 0.0306  |
| LPPIHQFSI | 98               |                  | 72               |         | 0.4884                         |         |
| ETAELIEEY | 114              |                  | 88               | 0.0649  |                                |         |
| TRPRPKIIL | 128              |                  | 102              |         |                                | 0.1409  |
| RPRPKIILV | 129              |                  | 103              |         | 0.0738                         |         |
| QSLKIAERY | 148              |                  | 122              | 0.2671  |                                |         |
| IAERYGFQY | 152              |                  | 126              | 0.0703  |                                |         |
| LLRKKIHST | 166              |                  | 140              |         | 0.0956                         |         |
| TSSNRKWSL | 174              |                  | 148              |         | 0.1764                         |         |
| EIKQKLMQI | 201              |                  | 175              |         | 0.0157                         |         |
| FPRDVAQAL | 220              |                  | 194              |         | 0.048                          |         |
| NQRLKERLL | 247              |                  | 221              |         | 0.1629                         |         |
| NAAPLVKYF | 281              |                  | 255              |         |                                | 0.2465  |
| YFQEKGLIM | 288              |                  | 262              |         | 0.2436                         | 0.3075  |
| QCEKLVEKY | 392              | 27               | 366              | 0.3852  |                                |         |
| RRIGDPQLV | 475              | 110              | 449              |         |                                | 0.0799  |
| LLQRSRSSL | 497              | 132              | 471              |         | 0.2989                         |         |
| YYRASIPVI | 521              | 156              | 495              |         |                                | 0.4896  |
| YRASIPVIA | 522              | 157              | 496              |         |                                | 0.2965  |
| RASIPVIAY | 523              | 158              | 497              |         |                                | 0.331   |
| ASIPVIAYY | 524              | 159              | 498              | 0.1899  |                                | 0.1448  |
| AYYETKTQL | 530              | 165              | 504              |         |                                | 0.0961  |

<sup>a</sup>Rank value is only provided for the strong binders for each HLA.

**Supplementary Table 3. AK5-derived peptides predicted as strong binders for HLA class II molecules.**

| Peptide         | Core       | Position (AK5-1) | Position (AK5-3) | HLA class II          | Rank % |
|-----------------|------------|------------------|------------------|-----------------------|--------|
| EDEVFYDISMAVDNK | VFYDISMAV  | 304              | 278              | DRB1*03:01            | 0.98   |
| FYDISMAVDNKLFPN | MAVDNKLFP  | 308              | 282              | DRB1*03:01            | 0.99   |
| YDISMAVDNKLFPNK | MAVDNKLFP  | 309              | 283              | DRB1*03:01            | 0.32   |
| DISMAVDNKLFPNKE | MAVDNKLFP  | 310              | 284              | DRB1*03:01            | 0.21   |
| ISMAVDNKLFPNKEA | MAVDNKLFP  | 311              | 285              | DRB1*03:01            | 0.88   |
| HQFSIESDTDLSETA | IESDTDLSE  | 102              | 76               | DQA1*05:01-DQB1*02:01 | 0.66   |
| QFSIESDTDLSETAE | IESDTDLSE  | 103              | 77               | DQA1*05:01-DQB1*02:01 | 0.34   |
| YGFQYISVGELLRKK | YISVGELLR  | 156              | 130              | DQA1*05:01-DQB1*02:01 | 0.78   |
| IAKIITTGELAPQET | IITTGELAPQ | 183              | 157              | DQA1*05:01-DQB1*02:01 | 0.92   |
| AKIITTGELAPQETT | IITTGELAPQ | 184              | 158              | DQA1*05:01-DQB1*02:01 | 0.94   |
| IPDEEGIVIDGFPRD | EEGIVIDGF  | 209              | 183              | DQA1*05:01-DQB1*02:01 | 0.70   |
| QEKGLIMTFDADRDE | IMTFDADR   | 290              | 264              | DQA1*05:01-DQB1*02:01 | 0.99   |
| EKGLIMTFDADRDED | IMTFDADR   | 291              | 265              | DQA1*05:01-DQB1*02:01 | 0.38   |
| KGLIMTFDADRDEDE | IMTFDADR   | 292              | 266              | DQA1*05:01-DQB1*02:01 | 0.22   |
| GLIMTFDADRDEDEV | IMTFDADR   | 293              | 267              | DQA1*05:01-DQB1*02:01 | 0.66   |
| DTGSDYEDQGDDQLN | YEDQGDDQL  | 345              | 319              | DQA1*05:01-DQB1*02:01 | 0.64   |
| TGSDYEDQGDDQLNV | YEDQGDDQL  | 346              | 320              | DQA1*05:01-DQB1*02:01 | 0.52   |
| GSDYEDQGDDQLNVF | YEDQGDDQL  | 347              | 321              | DQA1*05:01-DQB1*02:01 | 0.57   |

**Supplementary Table 4. Statistically significant up-regulated CSF proteins in anti-AK5 LE compared to anti-LGII/CASPR2 and anti-Yo/Ma2 patients.**

| Abbreviation          | Protein                                                                    | vs. Controls   |                   | vs. LGII/CASPR2 |                   | vs. Yo/Ma2 <sup>a</sup> |                   |
|-----------------------|----------------------------------------------------------------------------|----------------|-------------------|-----------------|-------------------|-------------------------|-------------------|
|                       |                                                                            | logFold Change | Corrected P value | logFold Change  | Corrected P value | logFold Change          | Corrected P value |
| CA3*                  | Carbonic anhydrase 3                                                       | 0.31           | 0.02              | 5.85            | 0.005             | 3.84                    | 0.0007            |
| CAPG                  | Macrophage-capping protein                                                 | 0.25           | 0.005             | 2.11            | 0.03              |                         |                   |
| CD209*                | CD 209 antigen                                                             | 0.13           | 0.004             | 1.00            | 0.03              | 0.76                    | 0.02              |
| CD300C                | CMRF35-like molecule 6                                                     | 0.11           | 0.002             | 1.42            | 0.03              |                         |                   |
| CSF3                  | Granulocyte colony-stimulating factor                                      | 0.25           | 0.007             | 1.13            | 0.04              |                         |                   |
| C1R                   | Complement 1r                                                              | 0.25           | 0.0002            | 3.27            | 0.01              |                         |                   |
| C4A/C4B*              | Complement c4-a/c4-b                                                       | 0.06           | 0.0001            | 1.28            | 0.001             | 0.71                    | 0.005             |
| FAM3B                 | Protein FAM3B                                                              | 0.14           | 0.003             | 1.04            | 0.01              |                         |                   |
| GFAP                  | Glial fibrillary acidic protein                                            | 0.16           | 0.0003            | 1.42            | 0.03              |                         |                   |
| GRN                   | Progranulin                                                                | 0.10           | 0.0008            | 1.32            | 0.003             |                         |                   |
| HAVCR2*               | Hepatitis A virus cellular receptor 2                                      | 0.13           | 0.0007            | 1.20            | 0.04              | 1.07                    | 0.03              |
| ISG15                 | Ubiquitin-like protein 15                                                  | 0.23           | 0.0004            | 1.74            | 0.001             |                         |                   |
| LYZ                   | Lysozyme C                                                                 | 0.09           | 0.0009            | 1.10            | 0.03              |                         |                   |
| MB*                   | Myoglobin                                                                  | 0.22           | 0.002             | 3.44            | 0.003             | 3.04                    | 0.0007            |
| MRC1                  | Macrophage mannose receptor 1                                              | 0.08           | 0.01              | 1.14            | 0.03              |                         |                   |
| PEBP1                 | Phosphatidylethanolamine-binding protein 1                                 | 0.03           | 0.04              | 0.84            | 0.04              |                         |                   |
| PGAM1                 | Phosphoglycerate mutase 1                                                  | 0.26           | 0.0009            | 1.73            | 0.008             |                         |                   |
| PPIA                  | Peptidyl-prolyl cis-trans isomerase A                                      | 0.05           | 0.0001            | 0.50            | 0.03              |                         |                   |
| PSME1*                | Proteasome activator complex subunit 1                                     | 0.15           | 0.0002            | 0.68            | 0.03              | 0.85                    | 0.04              |
| SLAMF7                | SLAM family member 7                                                       | 0.39           | 0.004             | 1.88            | 0.04              |                         |                   |
| SI00A4                | Protein SI00-A4                                                            | 0.09           | 0.04              | 0.81            | 0.04              |                         |                   |
| UBE2I                 | SUMO-conjugating enzyme UBC9                                               | 0.12           | 0.0005            | 0.68            | 0.04              |                         |                   |
| UFC1                  | Ubiquitin-fold modifier-conjugating enzyme 1                               | 0.09           | 0.01              | 0.91            | 0.04              |                         |                   |
| YWHAB/E/G/H/Q/Z & SFN | Protein 14-3-3 (beta/alpha, epsilon, eta, gamma, theta, zeta/delta, sigma) | 0.19           | 0.0004            | 2.48            | 0.003             |                         |                   |
| YWHAB                 | Protein 14-3-3 beta/alpha                                                  | 0.08           | 0.003             | 1.11            | 0.01              |                         |                   |
| YWHAZ                 | Protein 14-3-3 zeta/delta                                                  | 0.07           | 0.002             | 1.18            | 0.01              |                         |                   |

<sup>a</sup>Blank spaces correspond to non-significant differences in CSF protein expression between anti-AK5 and anti-Yo/Ma2 patients.

**Supplementary Table 5. Biological processes in which up-expressed CSF proteins in anti-AK5 LE, compared to anti-LGII/CASPR2 patients, were involved.**

| GO term    | Description                                                                                                   | FDR                    |
|------------|---------------------------------------------------------------------------------------------------------------|------------------------|
| GO:1900740 | Positive regulation of protein insertion into mitochondrial membrane involved in apoptotic signalling pathway | 4.81x10 <sup>-11</sup> |
| GO:1904951 | Positive regulation of establishment of protein localization                                                  | 7.61x10 <sup>-7</sup>  |
| GO:0051050 | Positive regulation of transport                                                                              | 4.90x10 <sup>-6</sup>  |
| GO:0002376 | Immune system process                                                                                         | 7.50x10 <sup>-6</sup>  |
| GO:0048584 | Positive regulation of response to stimulus                                                                   | 8.04x10 <sup>-6</sup>  |
| GO:0006955 | Immune response                                                                                               | 1.75x10 <sup>-5</sup>  |
| GO:0048583 | Regulation of response to stimulus                                                                            | 3.01x10 <sup>-5</sup>  |
| GO:0002252 | Immune effector process                                                                                       | 5.28x10 <sup>-5</sup>  |
| GO:0051707 | Response to other organism                                                                                    | 5.28x10 <sup>-5</sup>  |
| GO:0006950 | Response to stress                                                                                            | 6.67x10 <sup>-5</sup>  |
| GO:0051704 | Multi-organism process                                                                                        | 7.30x10 <sup>-5</sup>  |
| GO:0010638 | Positive regulation of organelle organization                                                                 | 7.65x10 <sup>-5</sup>  |
| GO:0010647 | Positive regulation of cell communication                                                                     | 0.00014                |
| GO:0023056 | Positive regulation of signalling                                                                             | 0.00014                |
| GO:0050896 | Response to stimulus                                                                                          | 0.00016                |
| GO:0002250 | Adaptive immune response                                                                                      | 0.00017                |
| GO:0002443 | Leukocyte mediated immunity                                                                                   | 0.00017                |
| GO:0098542 | Defence response to other organism                                                                            | 0.00017                |
| GO:0051130 | Positive regulation of cellular component organization                                                        | 0.00019                |
| GO:0051049 | Regulation of transport                                                                                       | 0.00021                |
| GO:0045087 | Innate immune response                                                                                        | 0.00023                |
| GO:0009967 | Positive regulation of signal transduction                                                                    | 0.00029                |
| GO:0044419 | Interspecies interaction between organisms                                                                    | 0.00036                |
| GO:0006952 | Defence response                                                                                              | 0.00036                |
| GO:0061024 | Membrane organization                                                                                         | 0.00037                |
| GO:0051246 | Regulation of protein metabolic process                                                                       | 0.00054                |
| GO:0009617 | Response to bacterium                                                                                         | 0.00056                |
| GO:0006958 | Complement activation, classical pathway                                                                      | 0.00065                |
| GO:0016032 | Viral process                                                                                                 | 0.00065                |
| GO:0052548 | Regulation of endopeptidase activity                                                                          | 0.00078                |
| GO:0010951 | Negative regulation of endopeptidase activity                                                                 | 0.00090                |
| GO:0006810 | Transport                                                                                                     | 0.00090                |
| GO:0002449 | Lymphocyte mediated immunity                                                                                  | 0.0011                 |
| GO:0033043 | Regulation of organelle organization                                                                          | 0.0011                 |
| GO:2000427 | Positive regulation of apoptotic cell clearance                                                               | 0.0016                 |
| GO:0030449 | Regulation of complement activation                                                                           | 0.0016                 |
| GO:0048522 | Positive regulation of cellular process                                                                       | 0.0017                 |
| GO:2000257 | Regulation of protein activation cascade                                                                      | 0.0018                 |
| GO:0048518 | Positive regulation of biological process                                                                     | 0.0019                 |
| GO:0051128 | Regulation of cellular component organization                                                                 | 0.0020                 |
| GO:0030162 | Regulation of proteolysis                                                                                     | 0.0023                 |
| GO:0032269 | Negative regulation of cellular protein metabolic process                                                     | 0.0024                 |
| GO:0065007 | Biological regulation                                                                                         | 0.0033                 |
| GO:0002682 | Regulation of immune system process                                                                           | 0.0034                 |
| GO:0072376 | Protein activation cascade                                                                                    | 0.0036                 |
| GO:0032268 | Regulation of cellular protein metabolic process                                                              | 0.0036                 |
| GO:0010646 | Regulation of cell communication                                                                              | 0.0036                 |
| GO:0065009 | Regulation of molecular function                                                                              | 0.0036                 |
| GO:0023051 | Regulation of signalling                                                                                      | 0.0039                 |
| GO:0050789 | Regulation of biological process                                                                              | 0.0043                 |
| GO:0002253 | Regulation of immune response                                                                                 | 0.0050                 |
| GO:0050776 | Regulation of immune response                                                                                 | 0.0050                 |
| GO:0002684 | Positive regulation of immune system process                                                                  | 0.0052                 |
| GO:0009966 | Regulation of signal transduction                                                                             | 0.0052                 |
| GO:0048523 | Negative regulation of cellular process                                                                       | 0.0057                 |
| GO:0002673 | Regulation of acute inflammatory response                                                                     | 0.0058                 |
| GO:0046718 | Viral entry into host cell                                                                                    | 0.0058                 |
| GO:0046827 | Positive regulation of protein export from nucleus                                                            | 0.0075                 |
| GO:0006959 | Humoral immune response                                                                                       | 0.0083                 |
| GO:0070613 | Regulation of protein processing                                                                              | 0.0104                 |
| GO:0035329 | Hippo signalling                                                                                              | 0.0111                 |
| GO:0001775 | Cell activation                                                                                               | 0.0111                 |
| GO:0051171 | Regulation of nitrogen compound metabolic process                                                             | 0.0114                 |
| GO:0002275 | Myeloid cell activation involved in immune response                                                           | 0.0145                 |
| GO:0010605 | Negative regulation of macromolecule metabolic process                                                        | 0.0146                 |
| GO:0080090 | Regulation of primary metabolic process                                                                       | 0.0154                 |
| GO:0043086 | Negative regulation of catalytic activity                                                                     | 0.0167                 |
| GO:0002237 | Response to molecule of bacterial origin                                                                      | 0.0169                 |
| GO:0044092 | Negative regulation of molecular function                                                                     | 0.0169                 |
| GO:0071222 | Cellular response to lipopolysaccharide                                                                       | 0.0175                 |



---

|            |                                                            |        |
|------------|------------------------------------------------------------|--------|
| GO:0060255 | Regulation of macromolecule metabolic process              | 0.0175 |
| GO:0050794 | Regulation of cellular process                             | 0.0175 |
| GO:0065008 | Regulation of biological quality                           | 0.0191 |
| GO:0051172 | Negative regulation of nitrogen compound metabolic process | 0.0220 |
| GO:0032480 | Negative regulation of type I interferon production        | 0.0221 |
| GO:0048167 | Regulation of synaptic plasticity                          | 0.0221 |
| GO:1901990 | Regulation of mitotic cell cycle phase transition          | 0.0221 |
| GO:0031400 | Negative regulation of protein modification process        | 0.0221 |
| GO:0002697 | Regulation of immune effector process                      | 0.0235 |
| GO:0045321 | Leukocyte activation                                       | 0.0235 |
| GO:0051222 | Positive regulation of protein transport                   | 0.0239 |
| GO:0010033 | Response to organic substance                              | 0.0253 |
| GO:0010941 | Regulation of cell death                                   | 0.0290 |
| GO:0031324 | Negative regulation of cellular metabolic process          | 0.0312 |
| GO:0035308 | Negative regulation of protein dephosphorylation           | 0.0326 |
| GO:0031347 | Regulation of defence response                             | 0.0342 |
| GO:0031399 | Regulation of protein modification process                 | 0.0415 |
| GO:0031323 | Regulation of cellular metabolic process                   | 0.0428 |
| GO:0031329 | Regulation of cellular catabolic process                   | 0.0488 |

---

**Supplementary Table 6. Biological processes in which up-expressed CSF proteins in anti-AK5 LE, compared to anti-Yo/Ma2 patients, were involved.**

| GO term    | Description                                           | FDR     |
|------------|-------------------------------------------------------|---------|
| GO:0002250 | Adaptive immune response                              | 0.00070 |
| GO:2000427 | Positive regulation of apoptotic cell clearance       | 0.00094 |
| GO:0002253 | Activation of immune response                         | 0.00094 |
| GO:0051707 | Response to other organism                            | 0.0014  |
| GO:0002376 | Immune system process                                 | 0.0014  |
| GO:0031347 | Regulation of defence response                        | 0.0022  |
| GO:0045087 | Innate immune response                                | 0.0022  |
| GO:0006958 | Complement activation, classical pathway              | 0.0027  |
| GO:0030449 | Regulation of complement activation                   | 0.0040  |
| GO:2000257 | Regulation of protein activation cascade              | 0.0040  |
| GO:0032101 | Regulation of response to external stimulus           | 0.0040  |
| GO:0006950 | Response to stress                                    | 0.0040  |
| GO:0002697 | Regulation of immune effector process                 | 0.0044  |
| GO:0072376 | Protein activation cascade                            | 0.0053  |
| GO:0052548 | Regulation of endopeptidase activity                  | 0.0053  |
| GO:0002673 | Regulation of acute inflammatory response             | 0.0070  |
| GO:0042102 | Positive regulation of T cell proliferation           | 0.0070  |
| GO:0006954 | Inflammatory response                                 | 0.0070  |
| GO:0051704 | Multi-organism process                                | 0.0077  |
| GO:0070613 | Regulation of protein processing                      | 0.0093  |
| GO:0009617 | Response to bacterium                                 | 0.0093  |
| GO:0045807 | Positive regulation of endocytosis                    | 0.0101  |
| GO:0019882 | Antigen processing and presentation                   | 0.0129  |
| GO:0002758 | Innate immune response-activating signal transduction | 0.0143  |
| GO:0051050 | Positive regulation of transport                      | 0.0230  |
| GO:0010951 | Negative regulation of endopeptidase activity         | 0.0239  |
| GO:0002252 | Immune effector process                               | 0.0244  |
| GO:0046677 | Response to antibiotic                                | 0.0318  |
| GO:0002237 | Response to molecule of bacterial origin              | 0.0334  |
| GO:0044092 | Negative regulation of molecular function             | 0.0345  |
| GO:0032268 | Regulation of cellular protein metabolic process      | 0.0394  |
| GO:0043687 | Post-translational protein modification               | 0.0397  |
| GO:0006979 | Response to oxidative stress                          | 0.0397  |
| GO:0006508 | Proteolysis                                           | 0.0397  |
| GO:0043902 | Positive regulation of multi-organism process         | 0.0423  |
